# Supplementary material for: A multiple genomic data fused SF2 prediction model, signature identification, and gene regulatory network inference for personalized radiotherapy
Source: PubMed Central journal article supplement — Technol Cancer Res Treat. 2020 Apr 24;19:1533033820909112. doi: 10.1177/1533033820909112 (PMC7225787; doi:10.1177/1533033820909112), 2020-04-24
Supplement: Clean_Revised_Supplementary_material_(1).pdf [file Clean_Revised_Supplementary_material_%281%29.pdf]

## **Supplementary Material**

**A multiple genomic data fused SF2 prediction model, signature identification and gene regulatory network inference for personalized radiotherapy**

## The details of MGPLS-UVE algorithm

### *VIP index in MGPLS algorithm*

To be more convincing, we explored the *VIP* to calculate the importance of each gene to the response variable, which is the basis for selecting the signature genes.<sup>1</sup>

$$VIP = \sqrt{p \times (q / \text{sum}(s))} \quad (S1)$$

where  $p$  is the number of genes in the training data set, and

$$s = \text{diag}(T' \times T \times Q \times Q') \quad (S2)$$

$$q = s' \times w \quad (S3)$$

where the parameters  $T$ ,  $Q$ ,  $w$  are calculated through MGPLS,  $w$  is the unitized form of  $W$ .

### *Cross-validation process and uninformative variable elimination (UVE)*

In MGPLS regression, it is essential to determine the right complexity of the model, i.e., the number of latent variables (LVs). The bigger the number of LVs, the much easier the model is to overfit. The number of LVs can be optimized by using cross-validation.<sup>2</sup> In this paper, when  $PRESS_h / RSS_{h-1} > 0.95^2$ , we believe that the new component will not improve the accuracy of the model, so  $h$  at this time is the optimal number of LVs.

In order to improve the modeling accuracy, 10 times of 6-fold cross-validation method was used to the model training. To do this:

- 1) we randomly divided 60 samples into 6 groups, 5 of which were selected as the training sets and the remaining 1 group was the verification set.
- 2) Then the *VIP* value of each gene was calculated.
- 3) Repeated steps 1)-2) for 6 times until every group was used as the verification set for one and only one time.
- 4) We averaged the *VIP* values obtained through these 6 times of cross-validation and recorded them as  $VIP_{i,j}$ .  $VIP_{i,j}$  is the *VIP* value for gene  $i$  in the  $j$ th round of cross-validation.
- 5) Repeated steps 1)-4) for 10 times and got the average value of  $VIP_{i,j}$  ( $j=1 \dots 10$ ) for each gene.
- 6) After sorting *VIP* values of all genes in descending order, UVE was performed (whose details are available below).
- 7) Repeated steps 1)-6) until the regression accuracy cannot be improved any more. The remaining genes were considered as signature genes.

In this paper, the number of genes removed in UVE process were different:

- 1) MGPLS rough selection procedure. According to the *VIP* value, we first removed 1 variable each time and repeated 22 times. As a result, 7600 variables were left. Then we removed 100 variables each time and repeated 71 times. Finally, 500 variables were left.
- 2) MGPLS fine selection procedure. According to the *VIP* value, we removed 1 variable each time and recorded the RMSE value of the model until all 500 variables were removed. Then the gene set with the lowest RMSE was considered as signature set.

## Brief introduction of LASSO algorithm

Given predictors  $\mathbf{x}_i$  and response values  $y_i$  for  $i=1, 2, \dots, n$ , the optimization goal is to find regression coefficients  $\boldsymbol{\beta}$  to minimize

$$\sum_{i=1}^n (y_i - \boldsymbol{\beta}' \mathbf{x}_i)^2 + \lambda \|\boldsymbol{\beta}\|_1 \quad (\text{S4})$$

where  $\lambda$  is the regularization parameter. Our GRN is a direct network that encodes the regulatory relationships among 113 signature genes. It is assumed that a gene can be directly regulated by other genes and a single CNV at most. In our case, response values denote the GE data of each gene; the matrix of GE data and CNV data of all genes are simultaneously used as predictors. After obtaining  $\boldsymbol{\beta}$  using coordinate descent algorithm, ordinary least square algorithm was employed to re-estimate non-zero coefficient element of  $\boldsymbol{\beta}$  to get final regression coefficients. *Cytoscape* toolkit was then used to visualize the obtained GRN.<sup>3</sup>

## The details of sparse GRN inference

Let  $\mathbf{E} \in \mathbf{R}_{113 \times 60}$  denote the matrix of GE data and  $\mathbf{C} \in \mathbf{R}_{113 \times 60}$  denote the matrix of CNV data.  $\mathbf{E} = [\mathbf{e}_1, \mathbf{e}_2, \dots, \mathbf{e}_{113}]$  and  $\mathbf{C} = [\mathbf{c}_1, \mathbf{c}_2, \dots, \mathbf{c}_{113}]$  where  $\mathbf{e}_i, \mathbf{c}_i$  are the  $i$ th row vector of matrix  $\mathbf{E}, \mathbf{C}$  respectively. The GRN is defined as follows:

$$\mathbf{e}_i = \mathbf{b}_i \mathbf{E} + \mathbf{f}_i \mathbf{C} + \boldsymbol{\mu}_i + \boldsymbol{\varepsilon}_i \quad (\text{S5})$$

where  $\mathbf{b}_i, \mathbf{f}_i$  denotes  $i$ th row vector of adjacency matrix  $\mathbf{B} \in \mathbf{R}_{113 \times 113}, \mathbf{F} \in \mathbf{R}_{113 \times 113}$  respectively. The element  $b_{ij}$  represents the activation (positive) or deactivation (negative) weight of edge from  $j$ th gene to  $i$ th gene;  $\boldsymbol{\mu}_i$  is a model bias that can be removed by mean centering; and  $\boldsymbol{\varepsilon}_i$  is a residual. Our goal is to estimate row vectors  $\mathbf{b}_i, \mathbf{f}_i$  that minimize  $\boldsymbol{\varepsilon}_i$ .

(S5) can be rewritten in a least square minimization problem as:

$$\min_{\mathbf{b}_i, \mathbf{f}_i} \|\mathbf{e}_i - \mathbf{b}_i \mathbf{E} - \mathbf{f}_i \mathbf{C}\|_2^2 \quad (\text{S6})$$

where  $\|\cdot\|_2$  denotes 2 norm.

In order to obtain sparse model and avoid the overfitting, we add L1 regularization term to (S6) to make it a LASSO regression form as follow:

$$\min_{\mathbf{b}_i, \mathbf{f}_i} \|\mathbf{e}_i - \mathbf{b}_i \mathbf{E} - \mathbf{f}_i \mathbf{C}\|_2^2 + \lambda_1 \|\mathbf{b}_i\|_1 + \lambda_2 \|\mathbf{f}_i\|_1 \quad (\text{S7})$$

where  $\lambda$ s are penalty coefficients.

There are two hypothesizes in the model:

- (1) There is no self-regulation, i.e., the diagonal elements of the  $\mathbf{B}$  matrix are all zero.
- (2) A gene can be directly regulated by only CNV that belong to the gene but no other genes, i.e., only diagonal elements of  $\mathbf{F}$  matrix can be non-zero.

Based on these two hypothesizes, (S6) can be rewritten as follow:

$$L(\boldsymbol{\beta}_i) = \min_{\boldsymbol{\beta}_i} \|\mathbf{e}_i - \boldsymbol{\beta}_i \mathbf{Y}\|_2^2 + \lambda \|\boldsymbol{\beta}_i\|_1 \quad (\text{S8})$$

where  $\beta_i = [b_{i1}, b_{i2}, \dots, b_{ii-1}, b_{ii+1}, \dots, b_{i113}, f_{ii}]$

$$\mathbf{Y} = [\mathbf{e}_1, \mathbf{e}_2, \dots, \mathbf{e}_{i-1}, \mathbf{e}_{i+1}, \dots, \mathbf{e}_{113}, \mathbf{c}_i].$$

Given  $\lambda$ , the optimal  $\beta_i$  can be found through using coordinate descent algorithm to (S8).

$$\frac{\partial L}{\partial \beta_{ij}} = -\mathbf{y}_i (\mathbf{e}_i^T - \mathbf{Y}_{(-j)}^T \beta_{i(-j)} - \mathbf{y}_j^T \beta_{ij}) + \lambda \partial_{\beta_{ij}} \|\beta_i\|_1 \quad (\text{S9})$$

where  $\mathbf{Y}_{(-j)}$  denotes matrix  $\mathbf{Y}$  whose  $j$ th row is removed, and  $\mathbf{y}_j$  denotes the  $j$ th row vector of  $\mathbf{Y}$ . Then (S9) can be rewritten as:

$$\frac{\partial L}{\partial \beta_{ij}} = -c_{ij} + a_{ij} \beta_{ij} + \lambda \partial_{\beta_{ij}} \|\beta_i\|_1 \quad (\text{S10})$$

where  $c_{ij} = \mathbf{y}_j (\mathbf{e}_i^T - \mathbf{Y}_{(-j)}^T \beta_{i(-j)})$ ,  $a_{ij} = \mathbf{y}_j \mathbf{y}_j^T$ . Then  $\beta_i$  can be calculated as follow:

$$\beta_{ij} = \begin{cases} \frac{(c_{ij} + \lambda)}{a_{ij}} & c_{ij} < -\lambda \\ 0 & |c_{ij}| \leq \lambda \\ \frac{(c_{ij} - \lambda)}{a_{ij}} & c_{ij} > \lambda \end{cases} \quad (\text{S11})$$

The overall procedure to construct sparse GRN is described in Table S1.

Table S1. Steps to construct sparse GRN

| Sparse GRN algorithm                                                                                                                                                                                                                                                                                                                                                                                                     |
|--------------------------------------------------------------------------------------------------------------------------------------------------------------------------------------------------------------------------------------------------------------------------------------------------------------------------------------------------------------------------------------------------------------------------|
| <pre> procedure SGRN (<math>\mathbf{e}_i, \mathbf{Y}, \lambda, \varepsilon</math>)   initialize <math>\beta_i</math>   while error &gt; <math>\varepsilon</math> do     <math>\beta_i^{old} = \beta_i</math>     for <math>j=1:m</math>       Update <math>\beta_{ij}</math> via (S11)     end for     error = <math>\ \beta_i^{old} - \beta_i\ _2</math>   end while   return <math>\beta_i</math> end procedure </pre> |

After obtaining adjacency matrices  $\mathbf{B}$  and  $\mathbf{F}$ , the genes with absolute values greater than 0.1 in  $\mathbf{B}$  and  $\mathbf{F}$  were selected, and prepared for the next least squares regression. Because the coefficients obtained by the above method are only used to select genes, they are not the final regression coefficients. For a gene  $g_i$ , other genes whose absolute values of regression coefficients were greater than 0.1 were selected as regulatory genes of  $g_i$ .

Table S2. 113 signature genes selected by MGPLS-UVE algorithm

| Serial number | Gene name | Entrez gene id | Chromosome | Cytoband | Regression coefficient | Data type |
|---------------|-----------|----------------|------------|----------|------------------------|-----------|
|               | constant  |                |            |          | 0.5472                 |           |
| 1             | YY1AP1    | 55249          | 1          | 1q22     | -0.0617                | CNV       |
| 2             | INPP5A    | 3632           | 10         | 10q26.3  | 0.0616                 | CNV       |
| 3             | DAP3      | 7818           | 1          | 1q22     | -0.0593                | CNV       |
| 4             | GON4L     | 54856          | 1          | 1q22     | -0.0567                | CNV       |
| 5             | JTB       | 10899          | 1          | 1q21     | -0.0467                | CNV       |
| 6             | TM9SF4    | 9777           | 20         | 20q11.21 | -0.0171                | GE        |
| 7             | NECAP2    | 55707          | 1          | 1p36.13  | -0.0167                | GE        |
| 8             | RBBP9     | 10741          | 20         | 20p11.2  | -0.0151                | GE        |
| 9             | YBX3      | 8531           | 12         | 12p13.1  | -0.0155                | GE        |
| 10            | NISCH     | 11188          | 3          | 3p21.1   | -0.0151                | GE        |
| 11            | SNRNP35   | 11066          | 12         | 12q24.31 | 0.0147                 | GE        |
| 12            | CCDC130   | 81576          | 19         | 19p13.2  | -0.0145                | GE        |
| 13            | HGH1      | 51236          | 8          | 8q24.3   | -0.0144                | GE        |
| 14            | RBBP4     | 5928           | 1          | 1p35.1   | -0.0142                | GE        |
| 15            | TGS1      | 96764          | 8          | 8q11     | -0.0138                | GE        |
| 16            | WRAP73    | 49856          | 1          | 1p36.3   | -0.0135                | GE        |
| 17            | VPS4B     | 9525           | 18         | 18q21.33 | 0.0131                 | GE        |
| 18            | DCTN6     | 10671          | 8          | 8p12-p11 | 0.0129                 | GE        |
| 19            | PSMG4     | 389362         | 6          | 6p25.2   | 0.0127                 | GE        |
| 20            | TYK2      | 7297           | 19         | 19p13.2  | -0.0127                | GE        |
| 21            | BAHD1     | 22893          | 15         | 15q15.1  | 0.0127                 | GE        |
| 22            | NOP2      | 4839           | 12         | 12p13    | -0.0122                | GE        |
| 23            | MIPEP     | 650794         | 13         | 13q12.11 | 0.0121                 | GE        |
| 24            | KIAA1468  | 57614          | 18         | 18q21.33 | 0.0119                 | GE        |
| 25            | PRCC      | 5546           | 1          | 1q21.1   | -0.0118                | GE        |
| 26            | CCDC174   | 51244          | 3          | 3p25.1   | -0.0118                | GE        |
| 27            | HAUS1     | 115106         | 18         | 18q21.1  | 0.0118                 | GE        |
| 28            | PRR14     | 78994          | 16         | 16p11.2  | -0.0118                | GE        |
| 29            | ATP5A1    | 498            | 18         | 18q21    | 0.0114                 | GE        |
| 30            | SLC7A1    | 56301          | 19         | 19q13.1  | 0.0111                 | GE        |
| 31            | SMARCC1   | 6599           | 3          | 3p21.31  | -0.0110                | GE        |
| 32            | RPS6KB2   | 6199           | 11         | 11q13.2  | -0.0107                | GE        |
| 33            | RNH1      | 6050           | 11         | 11p15.5  | 0.0102                 | GE        |
| 34            | TMEM185B  | 79134          | 2          | 2q14.2   | 0.0099                 | GE        |
| 35            | TTC8      | 123016         | 14         | 14q31.3  | 0.0098                 | GE        |
| 36            | LSM6      | 11157          | 4          | 4q31.22  | -0.0095                | GE        |
| 37            | RAD23B    | 5887           | 9          | 9q31.2   | 0.0094                 | GE        |
| 38            | ANP32B    | 10541          | 9          | 9q22.32  | 0.0093                 | GE        |
| 39            | RAD54L    | 8438           | 1          | 1p32     | -0.0089                | GE        |
| 40            | PYCR2     | 29920          | 1          | 1q42.12  | -0.0089                | GE        |

Table S2. 113 signature genes selected by MGPLS-UVE algorithm (continued)

|    |           |        |    |                 |         |    |
|----|-----------|--------|----|-----------------|---------|----|
| 41 | TRIM28    | 10155  | 19 | 19q13.4         | 0.0086  | GE |
| 42 | NDUFV1    | 4723   | 11 | 11q13           | -0.0086 | GE |
| 43 | TRMT44    | 152992 | 4  | 4p16.1          | -0.0084 | GE |
| 44 | SRRM1     | 10250  | 1  | 1p36.11         | -0.0082 | GE |
| 45 | PRPF19    | 27339  | 11 | 11q12.2         | -0.0081 | GE |
| 46 | NOP56     | 10528  | 20 | 20p13           | -0.0081 | GE |
| 47 | WDR4      | 10785  | 21 | 21q22.3         | -0.0080 | GE |
| 48 | ANAPC4    | 29945  | 4  | 4p15.2          | -0.0079 | GE |
| 49 | TUBGCP6   | 85378  | 22 | 22q13.31-q13.33 | -0.0077 | GE |
| 50 | HNRNPDL   | 9987   | 4  | 4q21.22         | 0.0077  | GE |
| 51 | CTCF      | 10664  | 16 | 16q21-q22.3     | 0.0075  | GE |
| 52 | C17orf62  | 79415  | 17 | 17q25.3         | -0.0075 | GE |
| 53 | TVP23B    | 51030  | 17 | 17p11.2         | 0.0074  | GE |
| 54 | ZBED4     | 9889   | 22 | 22q13.33        | -0.0070 | GE |
| 55 | DDB1      | 1642   | 11 | 11q12-q13       | -0.0070 | GE |
| 56 | EWSR1     | 2130   | 22 | 22q12.2         | 0.0069  | GE |
| 57 | LRCH1     | 23143  | 13 | 13q14.11        | 0.0068  | GE |
| 58 | EXOSC7    | 23016  | 3  | 3p21.31         | -0.0068 | GE |
| 59 | FARSA     | 2193   | 19 | 19p13.2         | -0.0068 | GE |
| 60 | DENND4B   | 9909   | 1  | 1q21            | -0.0066 | GE |
| 61 | MED28     | 80306  | 4  | 4p16            | -0.0066 | GE |
| 62 | NAF1      | 92345  | 4  | 4q32.2          | -0.0065 | GE |
| 63 | CNOT10    | 25904  | 3  | 3p22.3          | -0.0061 | GE |
| 64 | GCDH      | 2639   | 19 | 19p13.2         | -0.0060 | GE |
| 65 | TRIO      | 11078  | 22 | 22q13.1         | 0.0056  | GE |
| 66 | PPAT      | 5471   | 4  | 4q12            | -0.0054 | GE |
| 67 | RPL34     | 6164   | 4  | 4q25            | -0.0053 | GE |
| 68 | WBP4      | 11193  | 13 | 13q14.11        | 0.0053  | GE |
| 69 | CTTNBP2NL | 55917  | 1  | 1p13.2          | 0.0053  | GE |
| 70 | BCLAF1    | 9774   | 6  | 6q22-q23        | 0.0053  | GE |
| 71 | INTS5     | 80789  | 11 | 11q12.3         | -0.0052 | GE |
| 72 | ZNF764    | 92595  | 16 | 16p11.2         | -0.0047 | GE |
| 73 | UBIAD1    | 29914  | 1  | 1p36.22         | -0.0047 | GE |
| 74 | RAN       | 5901   | 12 | 12q24.3         | 0.0046  | GE |
| 75 | RPUSD2    | 27079  | 15 | 15q13.3         | 0.0045  | GE |
| 76 | CLN5      | 1203   | 13 | 13q21.1-q32     | 0.0041  | GE |
| 77 | GAR1      | 54433  | 4  | 4q25            | -0.0041 | GE |
| 78 | ZBTB39    | 9880   | 12 | 12q13.3         | -0.0039 | GE |
| 79 | PMS2P1    | 5379   | 7  | 7q22.1          | -0.0038 | GE |
| 80 | SMARCAD1  | 56916  | 4  | 4q22-q23        | -0.0037 | GE |
| 81 | BLM       | 641    | 15 | 15q26.1         | -0.0033 | GE |
| 82 | USP7      | 7874   | 16 | 16p13.3         | 0.0032  | GE |
| 83 | RNF138    | 51444  | 18 | 18q12.1         | 0.0029  | GE |

Table S2. 113 signature genes selected by MGPLS-UVE algorithm (continued)

|     |         |        |    |              |          |    |
|-----|---------|--------|----|--------------|----------|----|
| 84  | RPL9    | 6133   | 4  | 4p13         | -0.0028  | GE |
| 85  | RIOK1   | 83732  | 6  | 6p24.3       | 0.0027   | GE |
| 86  | MYB     | 4602   | 6  | 6q22-q23     | -0.0026  | GE |
| 87  | SNX7    | 51375  | 1  | 1p21.3       | 0.0025   | GE |
| 88  | METTL14 | 57721  | 4  | 4q26         | 0.0023   | GE |
| 89  | PAICS   | 10606  | 4  | 4q12         | -0.0023  | GE |
| 90  | NAT10   | 55226  | 11 | 11p13        | -0.0022  | GE |
| 91  | TAF11   | 6882   | 6  | 6p21.31      | -0.0022  | GE |
| 92  | POLD1   | 5424   | 19 | 19q13.3      | 0.0022   | GE |
| 93  | SHPRH   | 257218 | 6  | 6q24.3       | -0.0021  | GE |
| 94  | NFATC3  | 4775   | 16 | 16q22.2      | 0.0018   | GE |
| 95  | PMS2P3  | 5387   | 7  | 7q11.23      | -0.0016  | GE |
| 96  | PDCD2   | 5134   | 6  | 6q27         | 0.0016   | GE |
| 97  | TBP     | 6908   | 6  | 6q27         | -0.0014  | GE |
| 98  | NOP14   | 8602   | 4  | 4p16.3       | 0.0014   | GE |
| 99  | YWHAZ   | 7534   | 8  | 8q23.1       | 0.0012   | GE |
| 100 | SNRPD1  | 6632   | 18 | 18q11.2      | 0.0011   | GE |
| 101 | PTK2    | 5747   | 8  | 8q24.3       | 0.0010   | GE |
| 102 | CLNS1A  | 1207   | 11 | 11q13.5-q14  | -0.0009  | GE |
| 103 | CENPC   | 1060   | 4  | 4q13.2       | -0.0009  | GE |
| 104 | ABHD18  | 80167  | 4  | 4q28.2       | -0.0009  | GE |
| 105 | MCM3    | 4172   | 6  | 6p12         | 0.0007   | GE |
| 106 | MRPL16  | 54948  | 11 | 11q12.1      | -0.0007  | GE |
| 107 | MCM7    | 4176   | 7  | 7q21.3-q22.1 | -0.0005  | GE |
| 108 | WDR74   | 54663  | 11 | 11q12.3      | 0.0005   | GE |
| 109 | COMMD6  | 170622 | 13 | 13q22        | 0.0005   | GE |
| 110 | ABCE1   | 6059   | 4  | 4q31         | -0.0003  | GE |
| 111 | ENOPH1  | 58478  | 4  | 4q21.22      | -0.0002  | GE |
| 112 | KDELR2  | 11014  | 7  | 7p22.1       | 0.0001   | GE |
| 113 | MRPL1   | 29088  | 8  | 8q11.2-q13   | -0.00001 | GE |

\*Gene sorted by the absolute value of the regression coefficient. 24 “Hub” genes are highlighted.

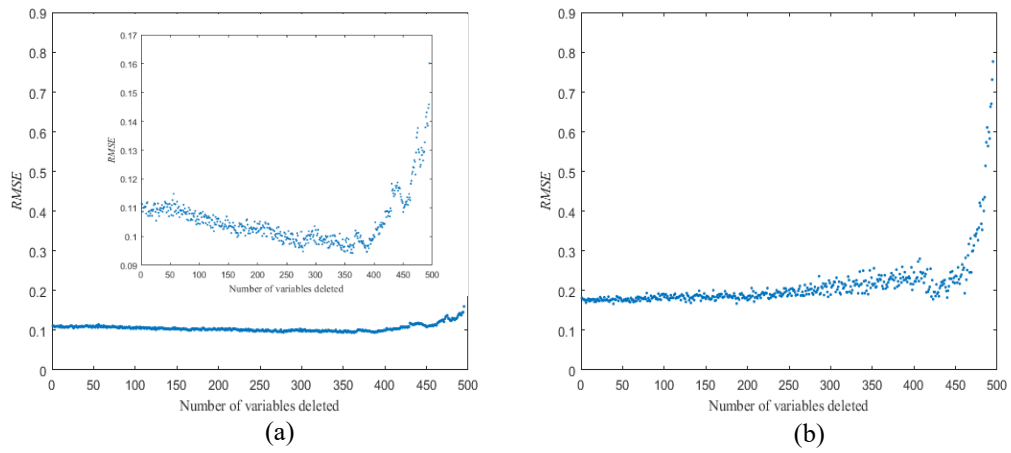

Figure S1. The RMSEs obtained by different number of genes. (a) RMSE trend using CNV and GE data; (b) RMSE trend using CNV, GE and ME data. When we delete unimportant genes, the prediction accuracy will increase and the RMSE value will decrease; conversely, the RMSE value will increase. Therefore, as the number of genes decreases, the value of RMSE will first decrease and then increase.



### ***GO and KEGG Pathway Enrichment Analysis Result***

GO and KEGG pathway analysis were performed for 113 signature genes (Figure S2). For Biological process, signature genes were mostly enriched in cellular nitrogen compound metabolic process, heterocycle metabolic process and organic cyclic compound metabolic process (Figure S2a). For molecular function, signature genes were mostly involved in binding, protein binding, heterocycle metabolic binding and organic cyclic compound binding (Figure S2b). For cellular component, signature genes were mostly associated with intracellular, intracellular part and intracellular organelle (Figure S2c). GO secondary classification map can be seen in Figure S3. In addition, 113 signature genes were enriched in 111 KEGG pathways, of which ribosome biogenesis in eukaryotes, DNA replication, homologous recombination and so on were highly significant. The results showed that more signature genes contribute to tumorigenesis and progression mostly through involvement in translation, DNA replication and repair, signal transduction, and cell growth and death (Figure S2d).

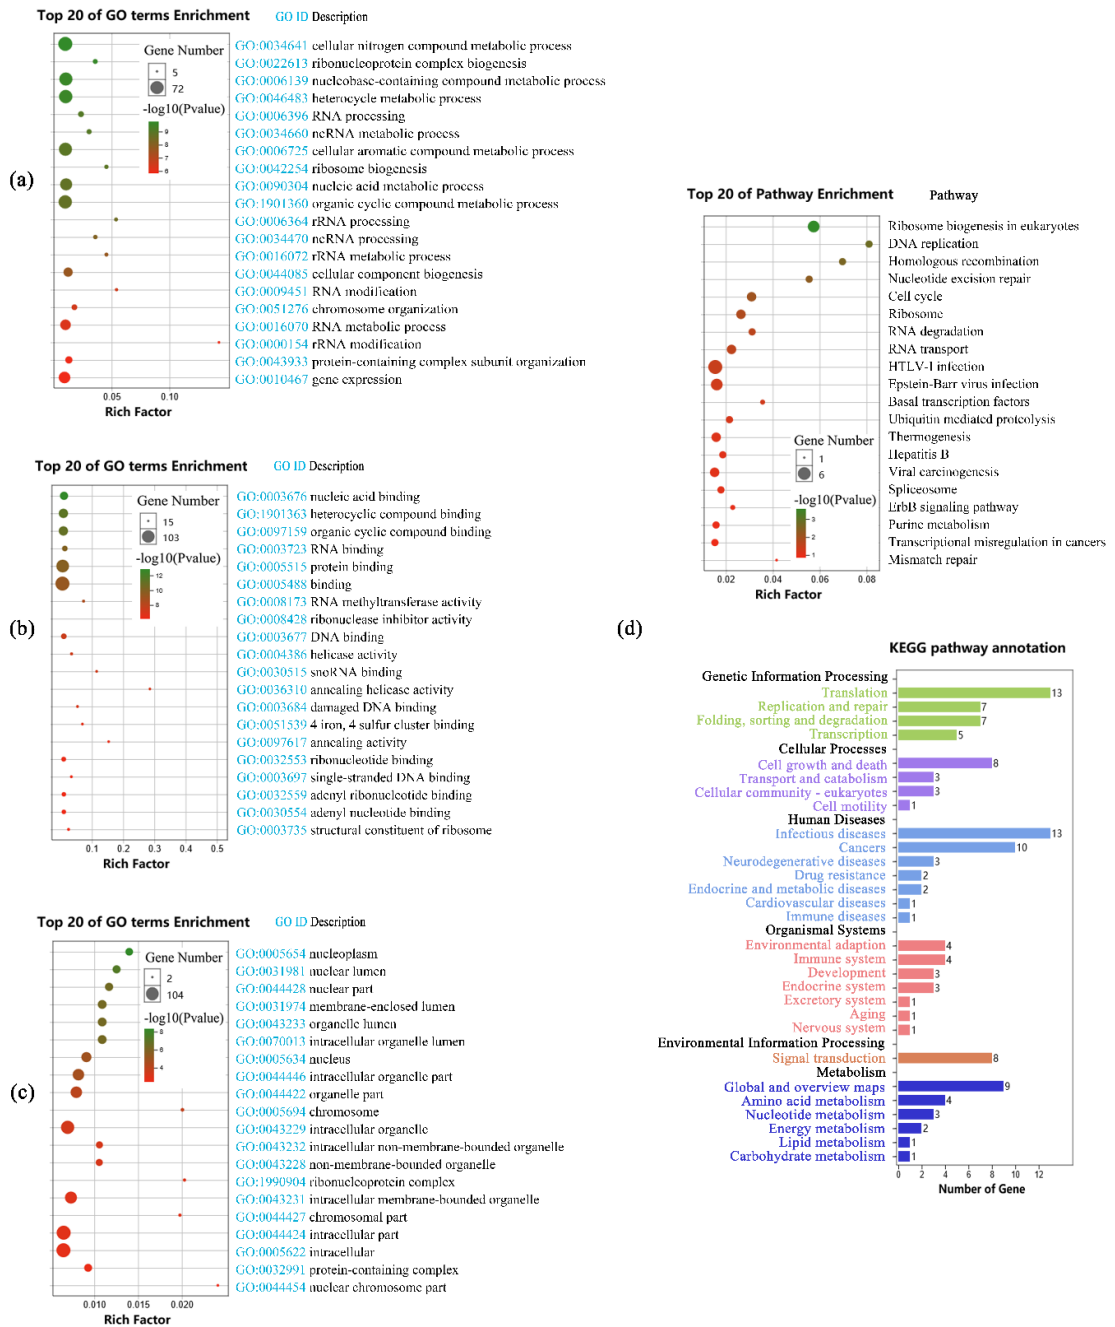

Figure S2. GO and KEGG analysis of 113 signature genes. (a) Top 20 of GO enrichment in Biological Process; (b) Top 20 of GO in Molecular Function; (c) Top 20 of GO enrichment in Cellular Component; (d) Top 20 of KEGG enrichment and KEGG pathway number chart. All terms are sorted in ascending p-values.

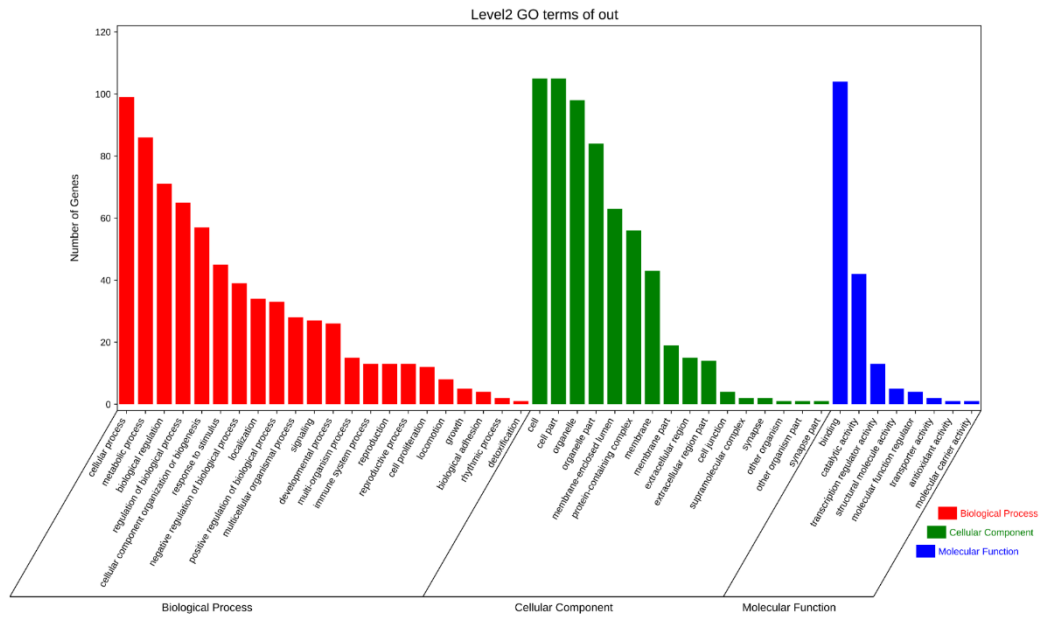

Figure S3. GO secondary classification map, which shows the number and enrichment condition of 113 genes in each GO term. Since a gene often corresponds to multiple GO terms, the same gene will appear under different classification items. In other words, it will be counted multiple times. If the number of genes of all the columns is added up, therefore, the value will be more than 113.

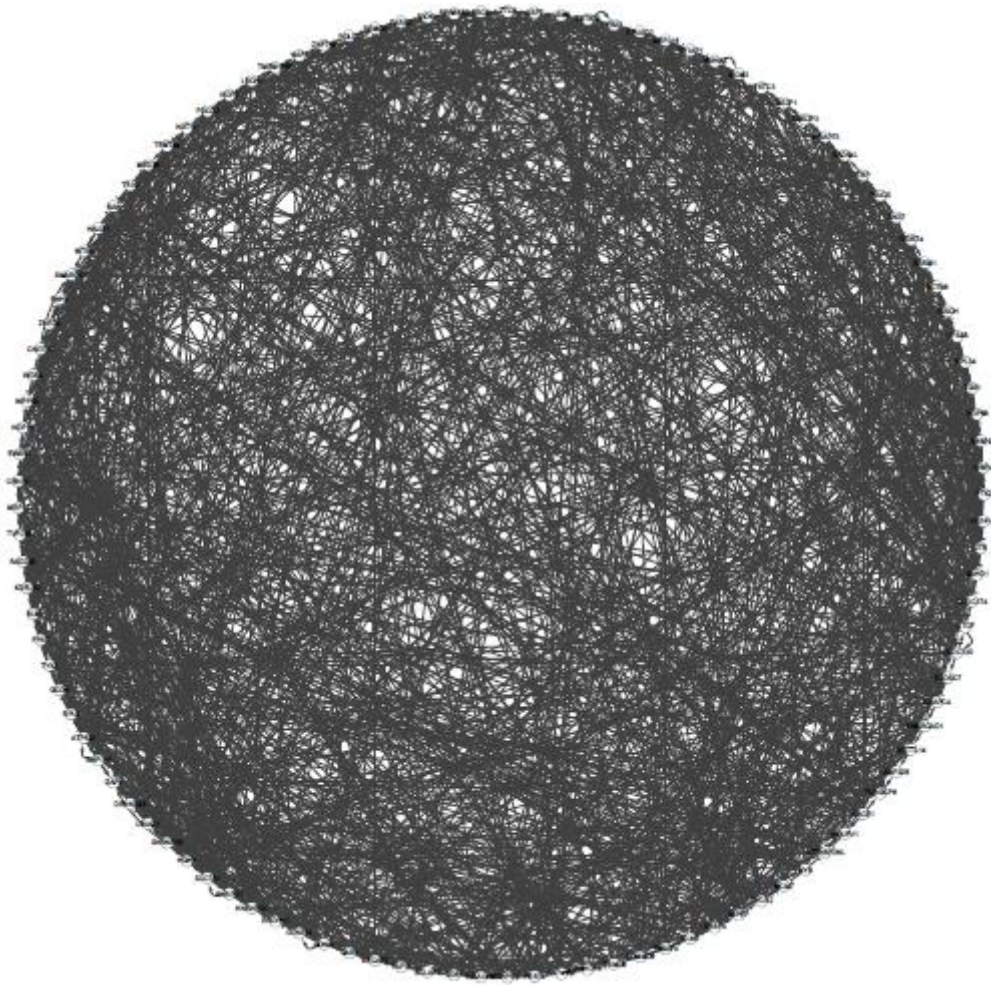

Figure S4. Gene regulatory network of all 113 genes (No further beautification).

Table S3. Pearson correlation coefficient of 12 genes

| Gene          | coefficient | <i>P</i> value | GE average value | GE standard deviation | CNV average value | CNV standard deviation |
|---------------|-------------|----------------|------------------|-----------------------|-------------------|------------------------|
| <i>ATP5A1</i> | 0.76        | 1.97e-12       | -0.01            | 0.88                  | -0.16             | 0.27                   |
| <i>BLM</i>    | 0.58        | 1.21e-6        | -0.01            | 0.92                  | 0.07              | 0.20                   |
| <i>CLNS1A</i> | 0.75        | 4.26e-12       | -0.01            | 0.87                  | 0.08              | 0.30                   |
| <i>EWSR1</i>  | 0.53        | 1.12e-5        | -0.004           | 0.86                  | -0.02             | 0.21                   |
| <i>MCM3</i>   | 0.56        | 2.68e-6        | -0.006           | 0.92                  | 0.05              | 0.20                   |
| <i>MIPEP</i>  | 0.65        | 1.89e-8        | -0.01            | 0.91                  | -0.09             | 0.24                   |
| <i>MYB</i>    | 0.54        | 8.28e-6        | -0.005           | 0.93                  | -0.03             | 0.27                   |
| <i>PDCD2</i>  | 0.58        | 1.03e-6        | -0.02            | 0.89                  | -0.06             | 0.18                   |
| <i>RPL9</i>   | 0.59        | 8.06e-7        | -0.02            | 0.89                  | -0.08             | 0.14                   |
| <i>RPL34</i>  | 0.73        | 4.77e-11       | -0.01            | 0.86                  | -0.12             | 0.16                   |
| <i>SNRPD1</i> | 0.60        | 5.28e-7        | -0.01            | 0.87                  | -0.06             | 0.20                   |
| <i>SRRM1</i>  | 0.53        | 1.37e-5        | -0.002           | 0.85                  | 0.03              | 0.19                   |

\* Sample size is 60.

## References

1. Mehmood T, Warringer J, Snipen L. Improving stability and understandability of genotype-phenotype mapping in *Saccharomyces* using regularized variable selection in L-PLS regression. *BMC Bioinformatics*. 2012;13(1):1-13.
2. Shao J. Linear model selection by cross-validation. *J Am Stat Assoc*. 1993;88(422):486-494.
3. Shannon P, Markiel A, Ozier O, et al. Cytoscape: a software environment for integrated models of biomolecular interaction networks. *Genome Res*. 2003;13(11):2498-2504.
